# Supplementary material for: LC-MS based cell metabolic profiling of tumor cells: a new predictive method for research on the mechanism of action of anticancer candidates
Source: Royal Society of Chemistry journal article supplement (doi:10.1039/c8ra00242h), 2018-01-01
Supplement: c8ra00242h1.pdf [file c8ra00242h1.pdf]

## Supplementary Materials

**Table 3 R<sup>2</sup> and Q<sup>2</sup> intercept values for the OPLS-DA mode**

| Name  | R <sup>2</sup> | Q <sup>2</sup> |
|-------|----------------|----------------|
| RP    | 0.640          | 0.604          |
| HI    | 0.752          | 0.669          |
| RP+HI | 0.909          | 0.869          |
| VDS   | 0.718          | 0.674          |
| GEM   | 0.791          | 0.715          |
| BCNU  | 0.682          | 0.638          |
| MIT   | 0.819          | 0.727          |
| API   | 0.838          | 0.762          |
| DIO   | 0.618          | 0.589          |

Note: RP are the database from RPLC method, HI are the database from HILIC method, RP+HI means that the RP and HI data was combined together.

**Table 4 CV-ANOVA parameters derived from cross-validation of OPLS-DA model**

|                    | SS      | df  | MS    | F      | P        | SD    |
|--------------------|---------|-----|-------|--------|----------|-------|
| <b>Total corr.</b> | 360     | 360 | 1     |        |          | 1     |
| <b>Regression</b>  | 239.189 | 42  | 5.695 | 14.990 | 4.01E-20 | 2.386 |
| <b>Residual</b>    | 120.811 | 318 | 0.380 |        |          | 0.616 |

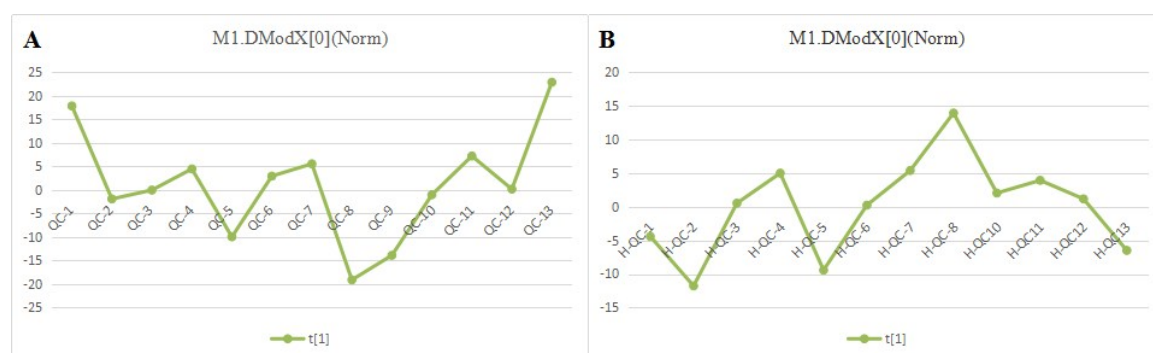

**Fig.7 Stability of UPLC-MS system in analysis**

A:RPLCmethod; B:HILIC method

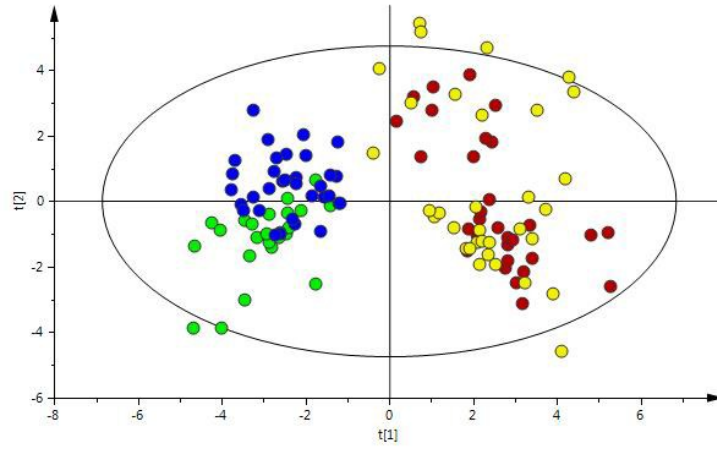

**Fig.8** The PCA score plot of cells in drug-treated groups of four classes  
 $R^2=0.426$   $Q^2=0.147$
